# Supplementary material for: Self-assembly of carboxylated polythiophene nanowires for improved bulk heterojunction morphology in polymer solar cells
Source: Royal Society of Chemistry journal article supplement (doi:10.1039/c2jm30576c), 2012-01-01
Supplement: c2jm30576c.pdf [file c2jm30576c.pdf]

Supporting Information

## Self-assembly of carboxylated polythiophene nanowires for improved bulk heterojunction morphology in polymer solar cells

Weiwei Li,<sup>a,b,§</sup> Brian J. Worfolk,<sup>a,b,§</sup> Peng Li,<sup>b</sup> Tate C. Hauger,<sup>a,b</sup> Kenneth D. Harris<sup>b</sup>  
and Jillian M. Buriak<sup>\*,a,b</sup>

<sup>a</sup> Department of Chemistry, University of Alberta, Edmonton, Alberta, T6G 2G2, Canada.

E-mail: jburiak@ualberta.ca

<sup>b</sup> National Institute for Nanotechnology, 11421 Saskatchewan Drive, Edmonton, Alberta, T6G 2M9, Canada.

<sup>§</sup> These two authors have equally contributed to this study.

### Surface Energy Calculation:

The method to calculate the surface energy relies on the following set of equations:<sup>S1</sup>

$$1 + \cos \theta = 2\sqrt{\gamma_s^d} \left( \frac{\sqrt{\gamma_l^d}}{\gamma_l^v} \right) + 2\sqrt{\gamma_s^h} \left( \frac{\sqrt{\gamma_l^h}}{\gamma_l^v} \right) \quad (1)$$

$$\gamma_s = \gamma_s^d + \gamma_s^h \quad (2)$$

In these equations, the indices h and d refer to the hydrogen bonding and dispersion force components, while s and l denote solid or liquid.  $\gamma_s$  refers to the surface energy of the solid,  $\gamma_l^v$  is the surface energy of the liquid, and  $\theta$  is the contact angle of the liquid with the solid surface. The surface energy parameters were found tabulated in the literature,<sup>S2</sup> and the relevant values are listed below:

|                      | $\gamma_l^d$<br>(mJ/m <sup>2</sup> ) | $\gamma_l^h$<br>(mJ/m <sup>2</sup> ) | $\gamma_l^v$<br>(mJ/m <sup>2</sup> ) |
|----------------------|--------------------------------------|--------------------------------------|--------------------------------------|
| H <sub>2</sub> O     | 21.8                                 | 51.0                                 | 72.8                                 |
| <i>n</i> -hexadecane | 26.35                                | 0                                    | 26.35                                |

To determine  $\gamma_s$ , we substitute the measured contact angle and known parameters  $\gamma_l^d$ ,  $\gamma_l^h$  and  $\gamma_l^v$  into equation (1) for both H<sub>2</sub>O and *n*-hexadecane as solvents. This forms a system of two equations in two unknowns that may be solved to calculate  $\gamma_s^d$  and  $\gamma_s^h$ . Equation (2) is then invoked to determine  $\gamma_s$ .

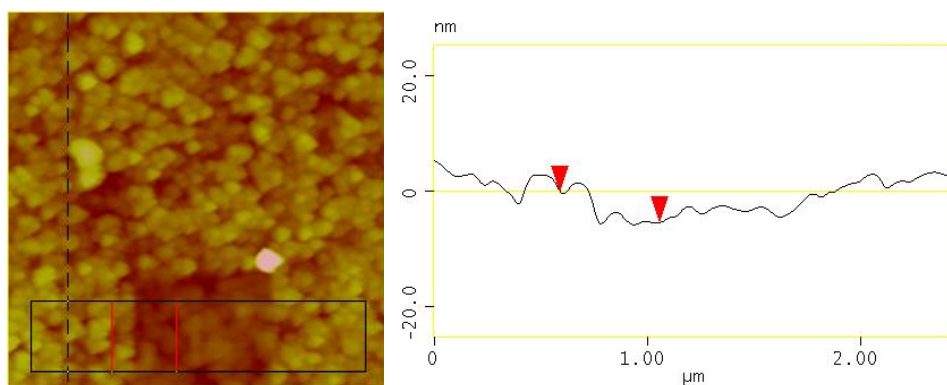

**Fig. S1** Determination by AFM of the thickness of P3CPenT deposited onto an ITO surface using the solution absorption method. The average thickness measured by this technique is ~4 nm. The red triangles were generated in the AFM analysis software, but were not used in the determination of thickness.

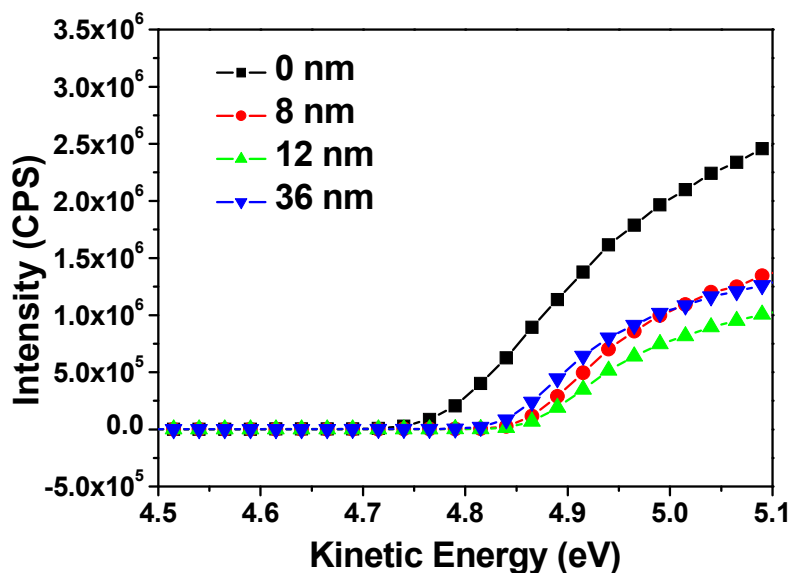

**Fig. S2** Ultraviolet photoelectron spectroscopy measurements of unmodified ITO and ITO modified with 8 nm, 12 nm and 36 nm of P3CPenT. Work functions are extracted from the onset.

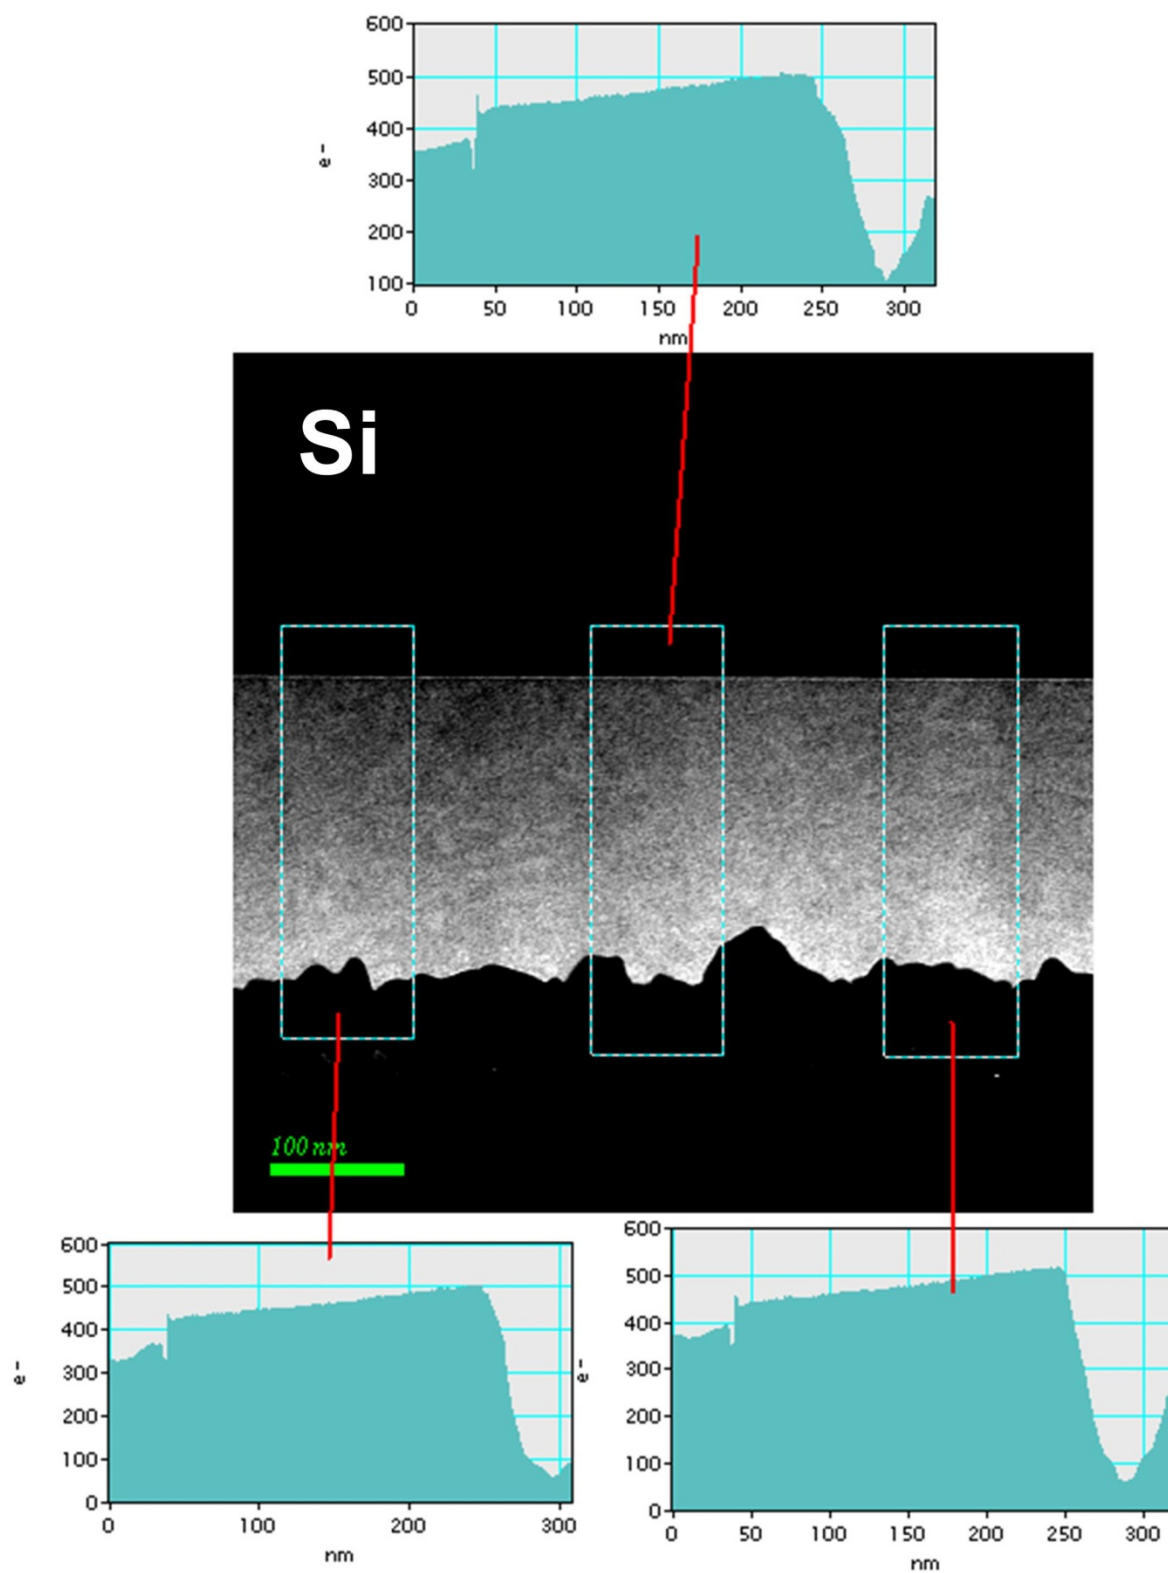

**Fig. S3** Large area cross sectional TEM images of samples with the following architecture: Si/P3HT:PCBM. Plots indicating the average pixel brightness within each rectangular area, which is related to chemical composition, are also included. The scale bars are 100 nm.

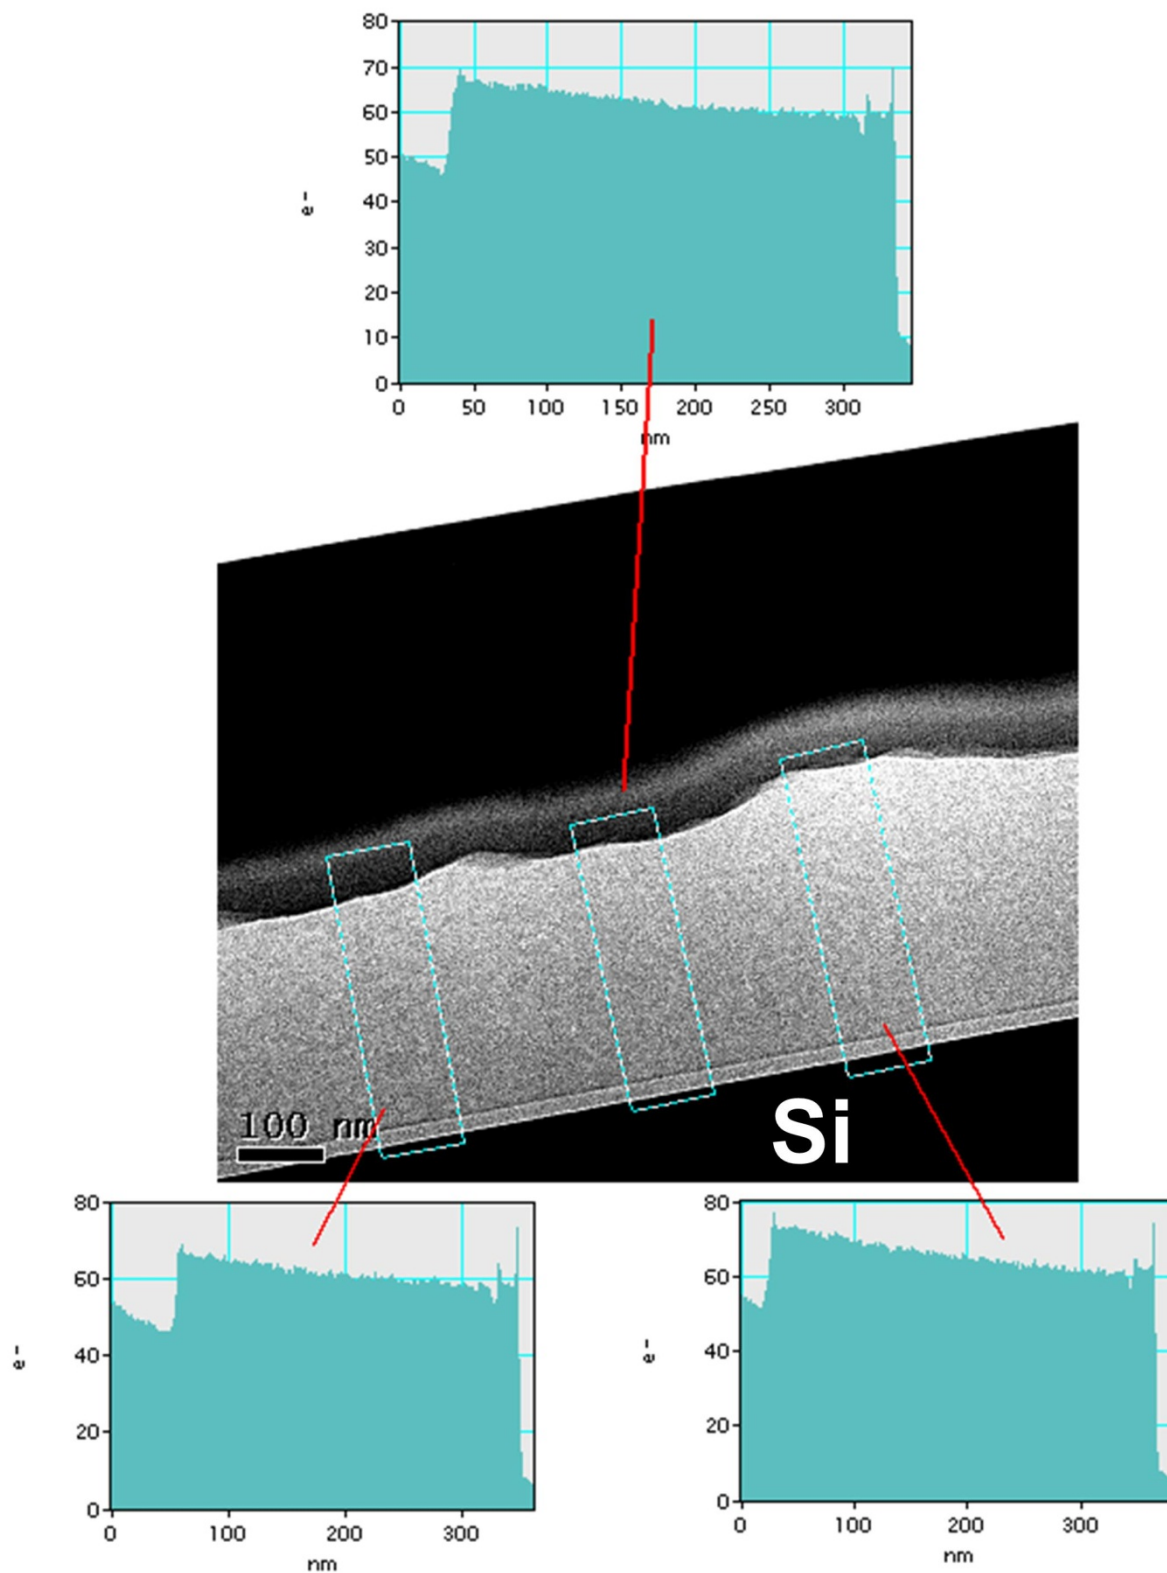

**Fig. S4** Large area cross sectional TEM images of samples with the following architecture: Si/PEDOT:PSS/P3HT:PCBM. Plots indicating the average pixel brightness within each rectangular area, which is related to chemical composition, are also included. The scale bars are 100 nm.

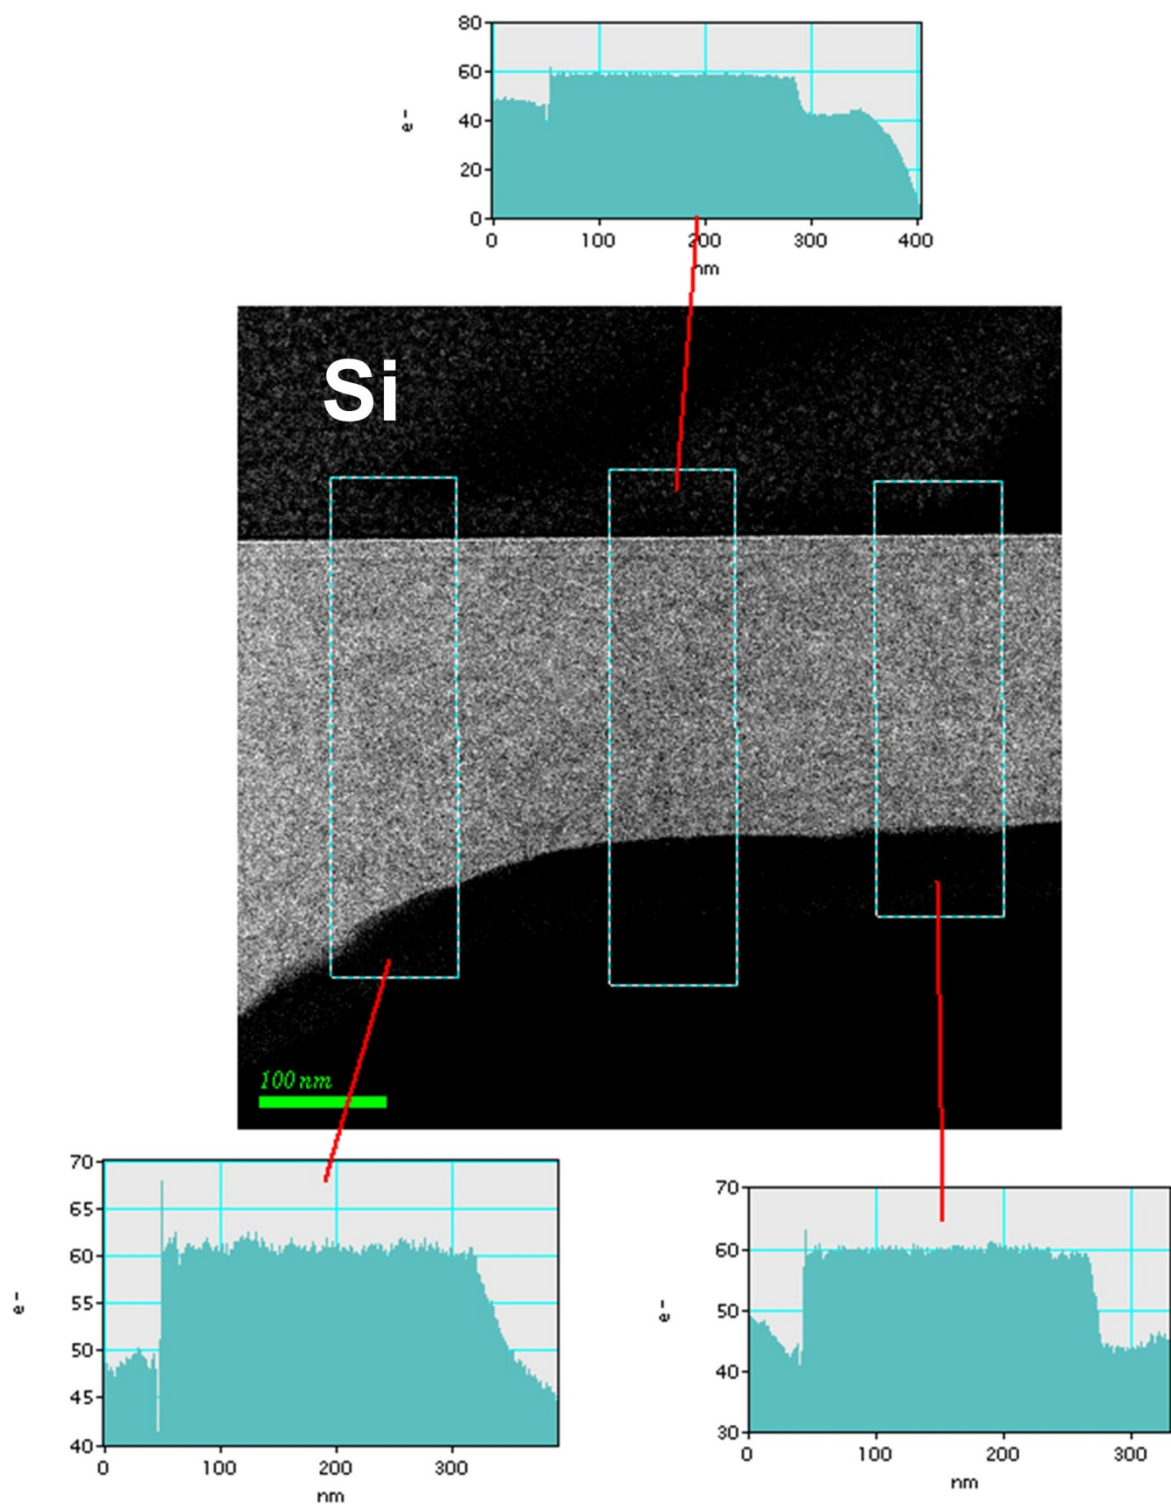

**Fig. S5** Large area cross sectional TEM images of samples with the following architecture: Si/P3CPenT/P3HT:PCBM. Plots indicating the average pixel brightness within each rectangular area, which is related to chemical composition, are also included. The scale bars are 100 nm.

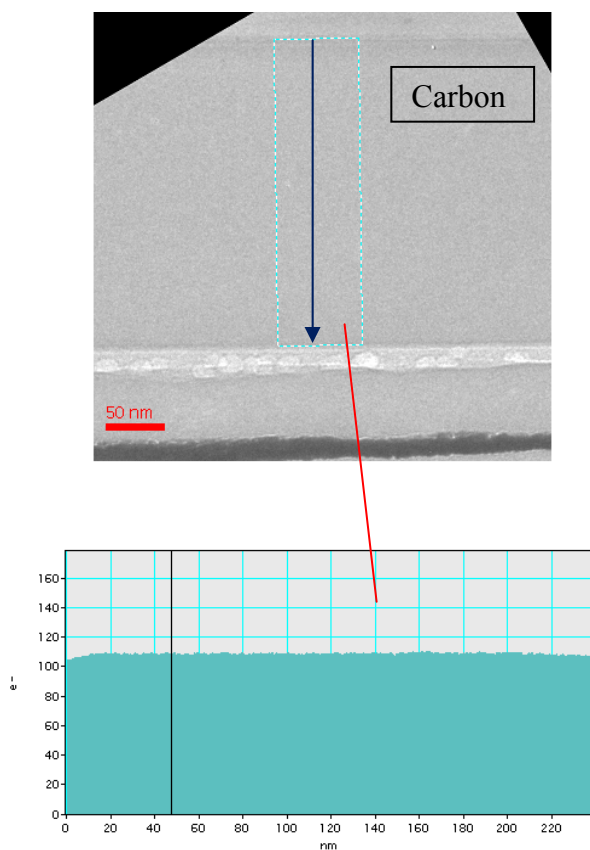

**Fig. S6** A cross sectional TEM image of a thin carbon sample which was prepared for microscopy under the same focussed ion beam conditions as the P3HT:PCBM samples shown in Figure 6 of the main text and Figure S2-S4 in this supporting information section. The TEM signal intensity profile across the carbon film is also included, and the uniform profile indicates a uniform thickness of the carbon film as prepared in the FIB instrument.

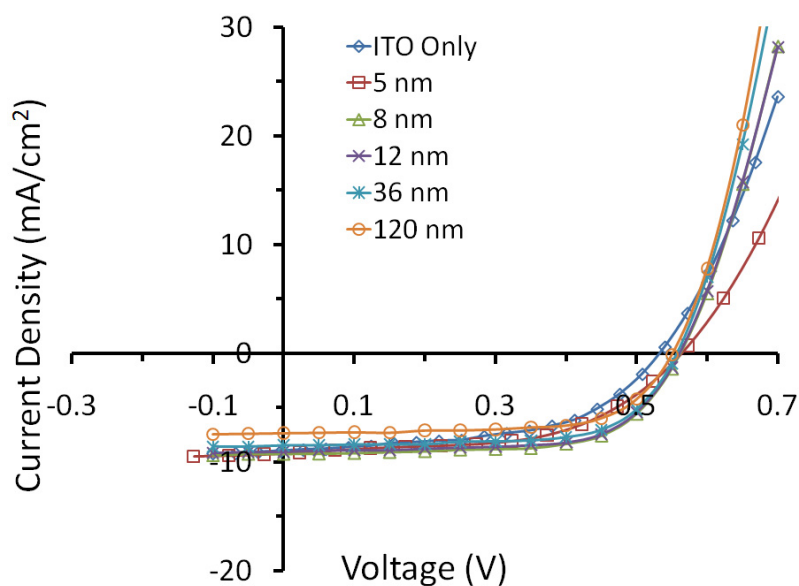

**Fig. S7** Current density-voltage curves for P3HT:PCBM PSCs fabricated with different thicknesses of P3CpenT as an HTL and illuminated with 100 mW/cm<sup>2</sup> simulated solar irradiation.

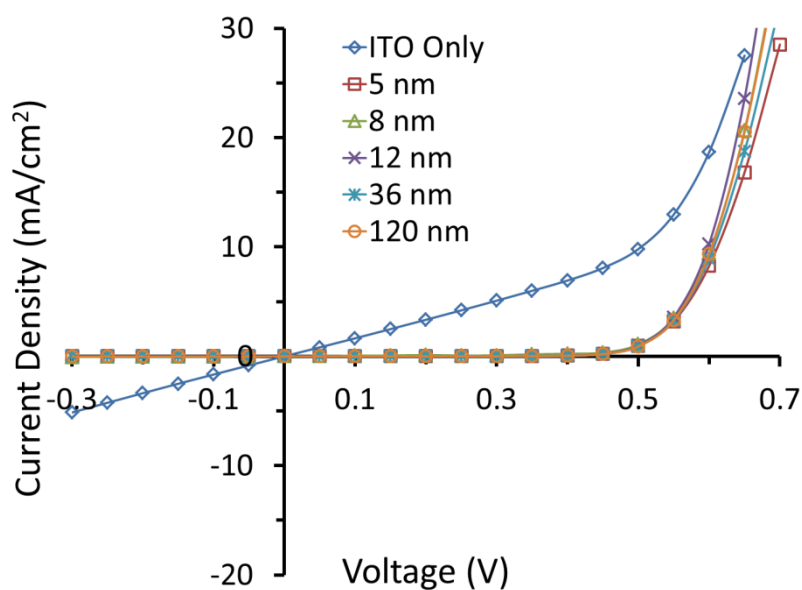

**Fig. S8** Current density-voltage curves for unilluminated P3HT:PCBM PSCs fabricated with different thicknesses of P3CpenT as HTL.

(a) 3000 rpm, 1 mg/mL P3CPenT in DMSO: ~5 nm

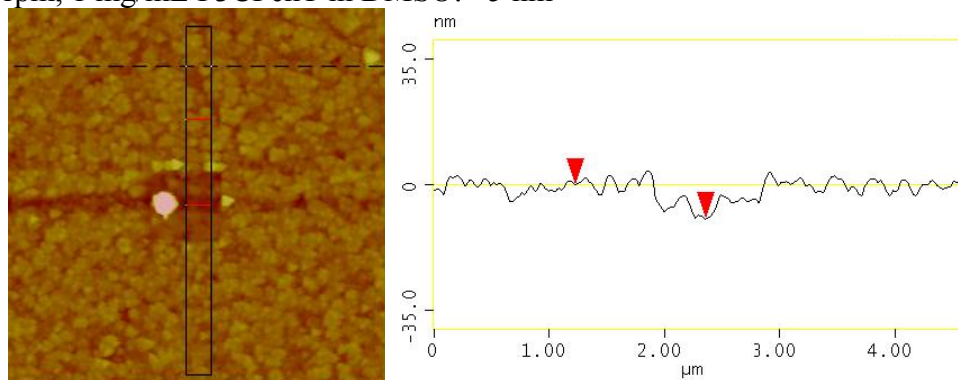

(b) 3000 rpm, 5 mg/mL P3CPenT in DMSO: ~8 nm

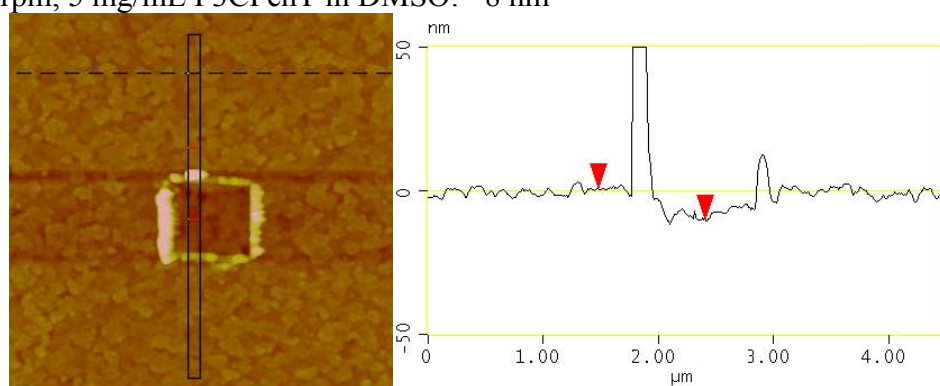

(c) 2000 rpm, 5 mg/mL P3CPenT in DMSO: ~12 nm

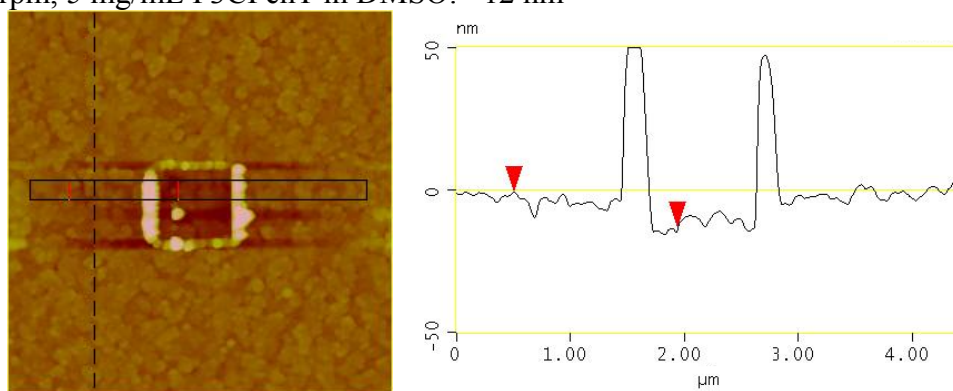

(d) 600 rpm, 5 mg/mL P3CPenT in DMSO: ~36 nm

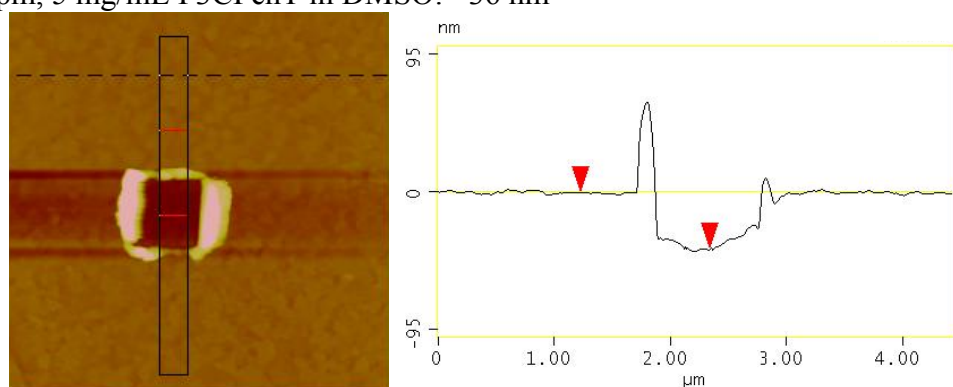



(e) 1000 rpm, 15 mg/mL P3CPenT in DMSO: ~120 nm

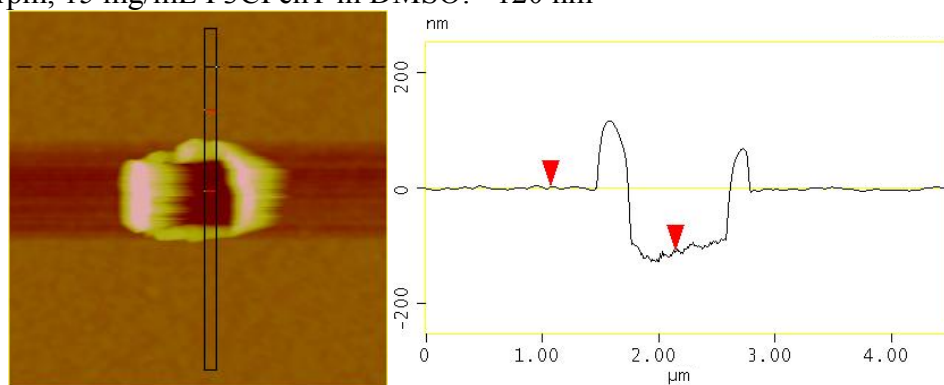

**Fig. S9** Determination of the average thickness of P3CPenT deposited on ITO surfaces by AFM. In (a), spin casting at 3000 rpm with 1 mg/mL P3CPenT in DMSO is found to lead to film thicknesses of ~5 nm, in (b), spin casting at 3000 rpm with 5 mg/mL P3CPenT in DMSO is found to lead to film thicknesses of ~8 nm, in (c), spin casting at 2000 rpm with 5 mg/mL P3CPenT in DMSO is found to lead to film thicknesses of ~12 nm, in (d), spin casting at 600 rpm with 5 mg/mL P3CPenT in DMSO is found to lead to film thicknesses of ~36 nm, and in (e), spin casting at 1000 rpm with 15 mg/mL P3CPenT in DMSO is found to lead to film thicknesses of ~120 nm. The red triangles were generated in the AFM analysis software, but were not used in the determination of thickness. In each panel, the AFM image dimensions are 5 μm x 5 μm.

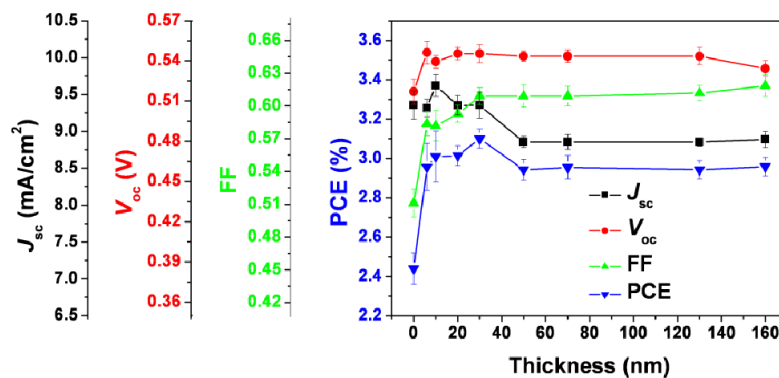

**Fig. S10** Influence of PEDOT:PSS HTL thickness over P3HT:PCBM device performance. Each point represents the average of 4 PV devices.

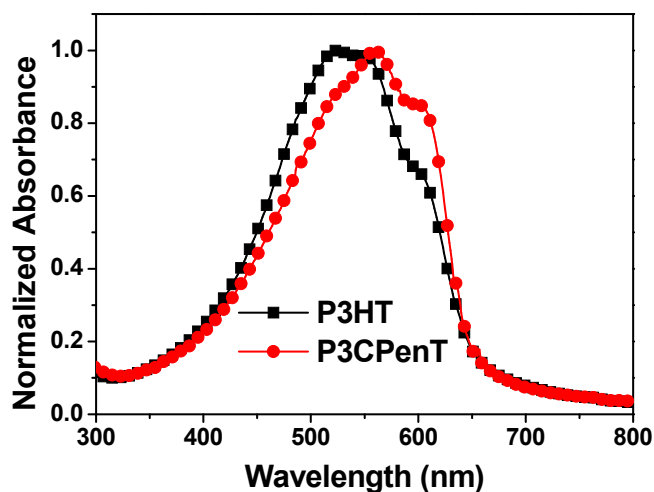

Fig. S11 Normalized absorption spectra of P3HT and P3CPenT films.

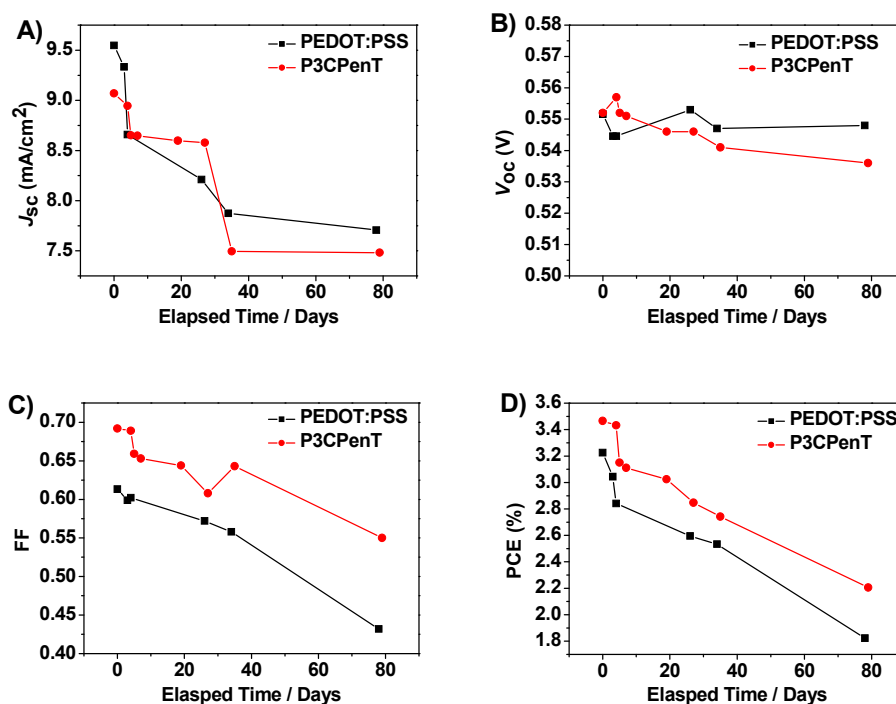

Fig. S12 Degradation of photovoltaic parameters for P3HT:PCBM BHJ devices fabricated with PEDOT:PSS (30 nm) or P3CPenT (12 nm) as an HTL. A)  $J_{sc}$ ; B)  $V_{oc}$ ; C) FF and D) PCE.



**Table S3** Average photovoltaic parameters of devices fabricated with various HTLs: only ITO, PEDOT:PSS (30 nm), P3CPenT (8 nm) and dip-cast P3CPenT. Standard deviations are included in parentheses. The fourth entry confirms that PSCs based on P3CPenT HTLs formed by dip-casting/absorption methods are also functional.

| HTL       | $J_{sc}$<br>(mA/cm <sup>2</sup> ) | $V_{oc}$ (V)    | FF              | PCE<br>(%)     | $R_s$<br>( $\Omega$ cm <sup>2</sup> ) | $R_{sh}$<br>(k $\Omega$ cm <sup>2</sup> ) | Best PCE<br>(%) |
|-----------|-----------------------------------|-----------------|-----------------|----------------|---------------------------------------|-------------------------------------------|-----------------|
| Only ITO  | 9.24<br>(0.16)                    | 0.52<br>(0.01)  | 0.51<br>(0.01)  | 2.44<br>(0.1)  | 6.03<br>(0.12)                        | 0.34<br>(0.09)                            | 2.5             |
| PEDOT:PSS | 9.24<br>(0.09)                    | 0.55<br>(0.003) | 0.61<br>(0.006) | 3.1<br>(0.13)  | 8.17<br>(0.14)                        | 1.78<br>(0.03)                            | 3.4             |
| P3CPenT   | 9.26<br>(0.18)                    | 0.56<br>(0.002) | 0.67<br>(0.006) | 3.42<br>(0.12) | 6.45<br>(0.20)                        | 1.81<br>(0.04)                            | 3.7             |
| P3CPenT*  | 9.17<br>(0.06)                    | 0.56<br>(0.005) | 0.60<br>(0.005) | 3.06<br>(0.06) | 6.73<br>(0.17)                        | 1.79<br>(0.13)                            | 3.1             |

\* This P3CPenT layer was formed by immersing an ITO-coated substrate into P3CPenT solution (DMSO) as described in the experimental section.

## References

- S1 D. K. Owens and R. C. Wendt, *J. Appl. Polym. Sci.*, 1969, **13**, 1741.  
S2 B. Jańczuk and E. Chibowski, *J. Coll. Inter. Sci.*, 1983, **95**, 268.
